# Supplementary material for: Revisiting the Solubility–Permeability Relationship with Hydrophobic Drug Umifenovir in Pluronic Solutions: Impact of pH and Co-Solvent
Source: MDPI journal article supplement (doi:10.3390/pharmaceutics15020422), 2023-01-27
Supplement: s1 [file s1]

Supporting Information - content:

|                                                                                                                                                                                                                                                                                                             |    |
|-------------------------------------------------------------------------------------------------------------------------------------------------------------------------------------------------------------------------------------------------------------------------------------------------------------|----|
| <b>Figure S1.</b> The PXRD patterns of: raw UMF base (black), raw UMF·HCl·H <sub>2</sub> O (red), solid residuals after the solubility experiments of UMF base in buffer pH 2.0 (blue) and with 7% F-127 (cyan), in buffer pH 7.4 (olive), with 7% F-127 (green), and with 7% F-127 and 20% ethanol (pink). | P2 |
| <b>Figure S2.</b> Plots of $(S_2 - S_2^0)$ on $(C_{F-127} - cmc)$ dependences at different concentrations of F-127 in buffers pH 2.0 (blue) and pH 7.4 (olive) and in the presence of 10 % (violet) and 20 % (pink) of ethanol.                                                                             | P3 |
| <b>Figure S3.</b> Plots correlating the UMF solubility in micellar F-127 solutions normalized by the aqueous solubility $((S_2 - S_2^0) / S_2^0)$ on F-127 concentration $(C_{F-127})$ in buffers pH 2.0 (blue) and pH 7.4 (olive) and in the presence of 10 % (violet) and 20 % (pink) of ethanol.         | P4 |
| <b>Figure S4.</b> Debye-plots for systems of pluronic F-127 with and without UMF: buffer pH 2.0, buffer pH 7.4, buffer pH 7.4+10% EtOH and buffer pH 7.4+20% EtOH.                                                                                                                                          | P5 |
| <b>Figure S5.</b> Size distribution of F127 micelles: (a) buffer pH 2.0; (b) buffer pH 2.0+UMF; (c) buffer pH 7.4; (d) buffer pH 7.4+UMF; (e) buffer pH 7.4+10% EtOH; (f) buffer pH 7.4+10% EtOH+UMF; (g) buffer pH 7.4+20% EtOH; (h) buffer pH 7.4+20% EtOH+UMF.                                           | P6 |
| <b>Table S1.</b> UMF experimental solubility ( $S_{UMF}$ ) in buffer pH 2.0, pH 7.4, with addition of F-127, and 10/20% ethanol at 310.15 K.                                                                                                                                                                | P7 |
| <b>Table S2.</b> Donor solution concentrations ( $C_0$ ), steady state flux ( $J$ ), and permeability coefficients ( $P_{app}$ ) of UMF, 310.15 K.                                                                                                                                                          | P7 |

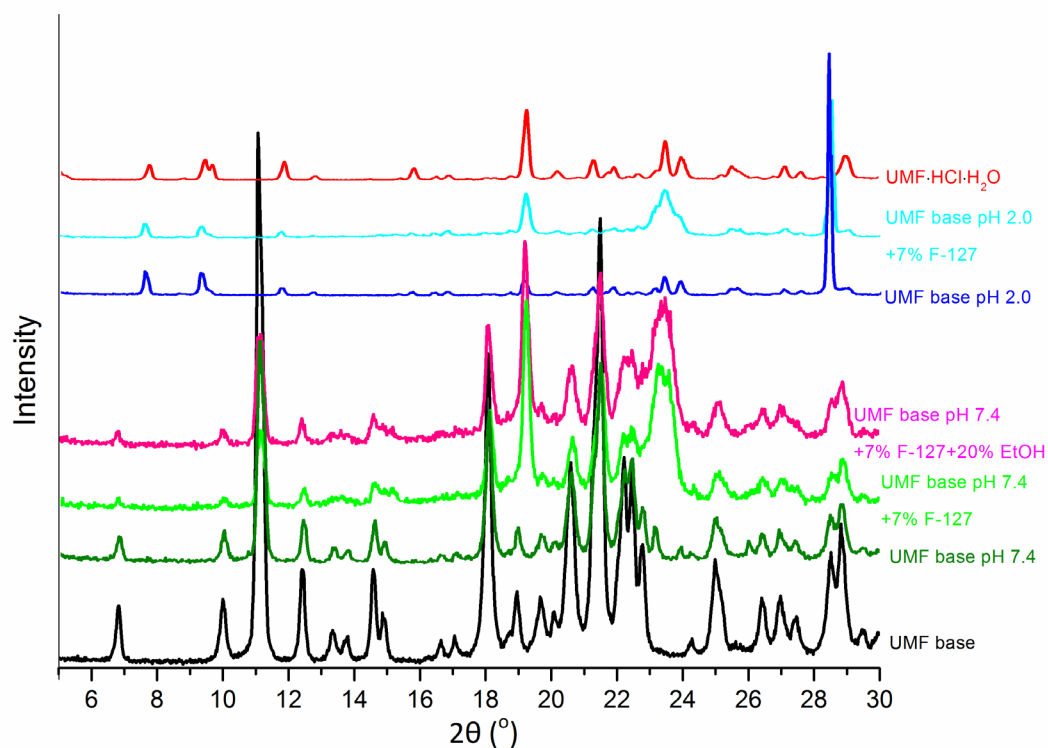

**Figure S1.** The PXRD patterns of: raw UMF base (black), raw UMF·HCl·H<sub>2</sub>O (red), solid residuals after the solubility experiments of UMF base in buffer pH 2.0 (blue) and with 7% F-127 (cyan), in buffer pH 7.4 (olive), with 7% F-127 (green), and with 7% F-127 and 20% ethanol (pink).

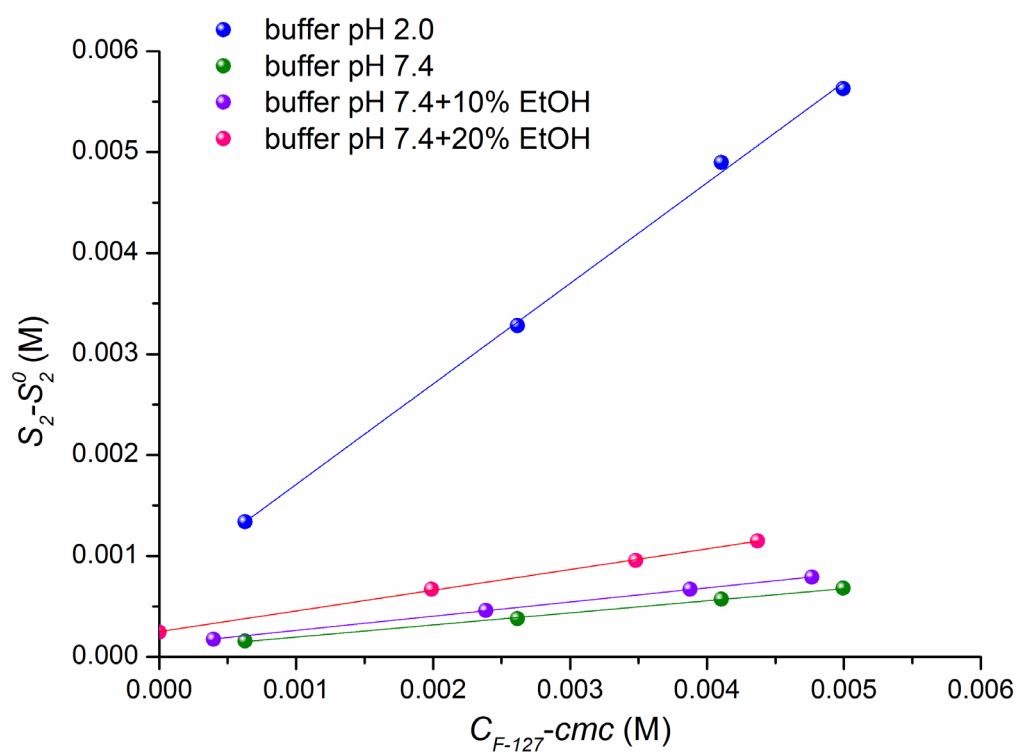

**Figure S2.** Plots of  $(S_2 - S_2^0)$  on  $(C_{F-127} - cmc)$  dependences at different concentrations of F-127 in buffers pH 2.0 (blue) and pH 7.4 (olive) and in the presence of 10 % (violet) and 20 % (pink) of ethanol.

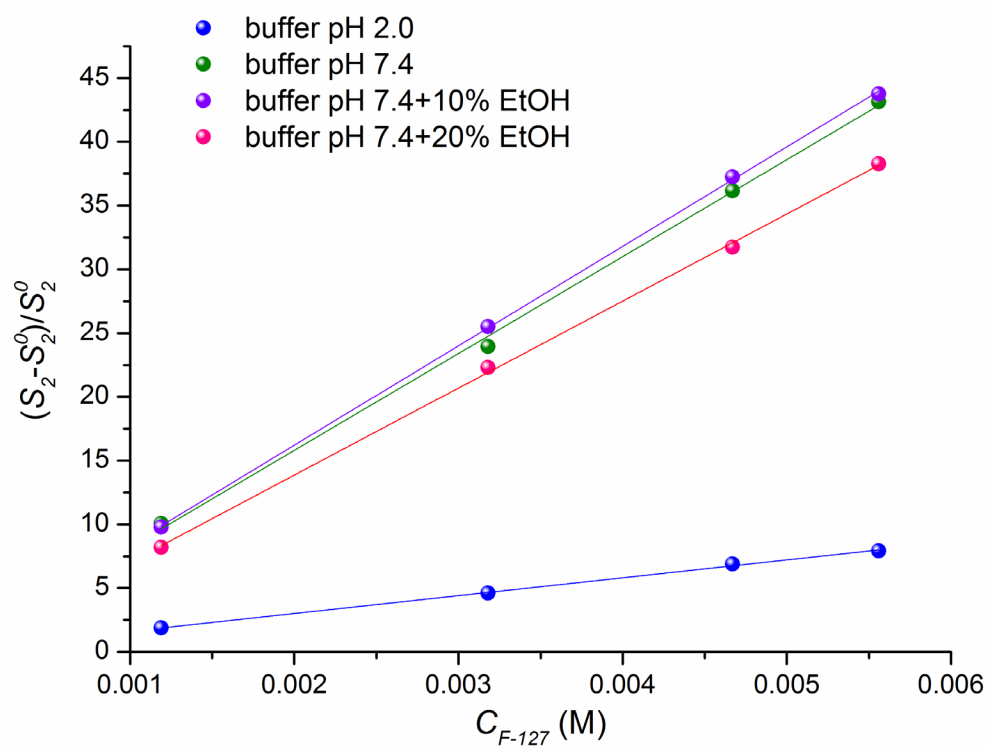

**Figure S3.** Plots correlating the UMF solubility in micellar F-127 solutions normalized by the aqueous solubility  $((S_2 - S_2^0)/S_2^0)$  on F-127 concentration ( $C_{F-127}$ ) in buffers pH 2.0 (blue) and pH 7.4 (olive) and in the presence of 10 % (violet) and 20 % (pink) of ethanol.

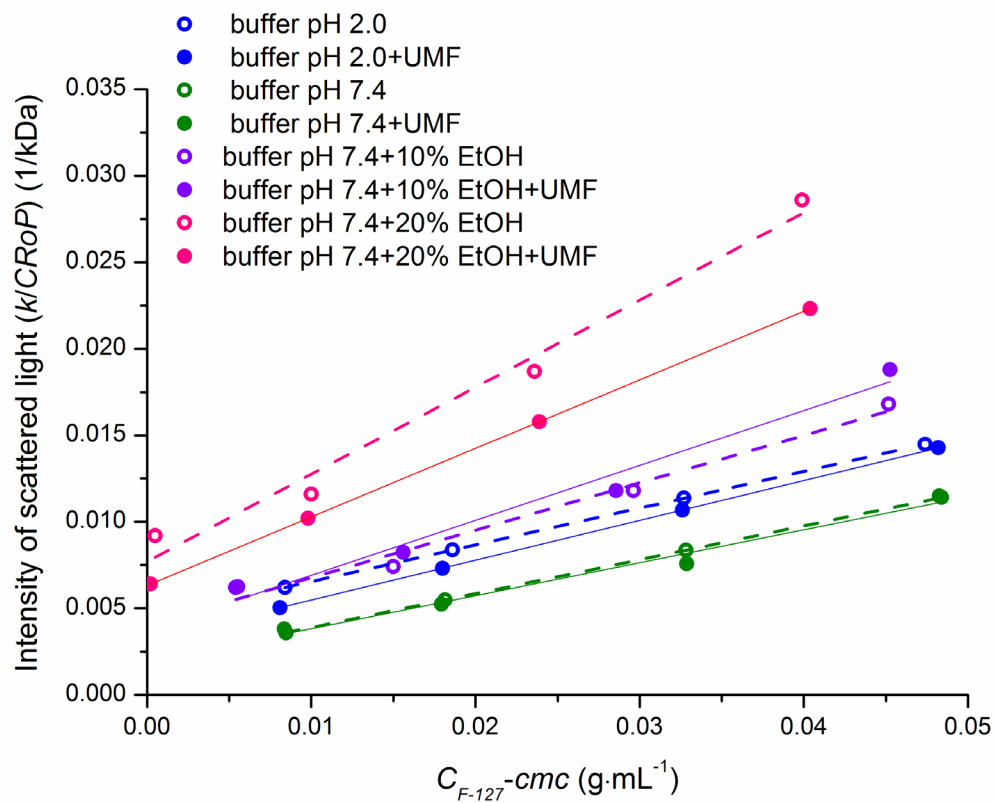

**Figure S4.** Debye-plots for systems of pluronic F-127 with and without UMF: buffer pH 2.0, buffer pH 7.4, buffer pH 7.4+10% EtOH and buffer pH 7.4+20% EtOH.

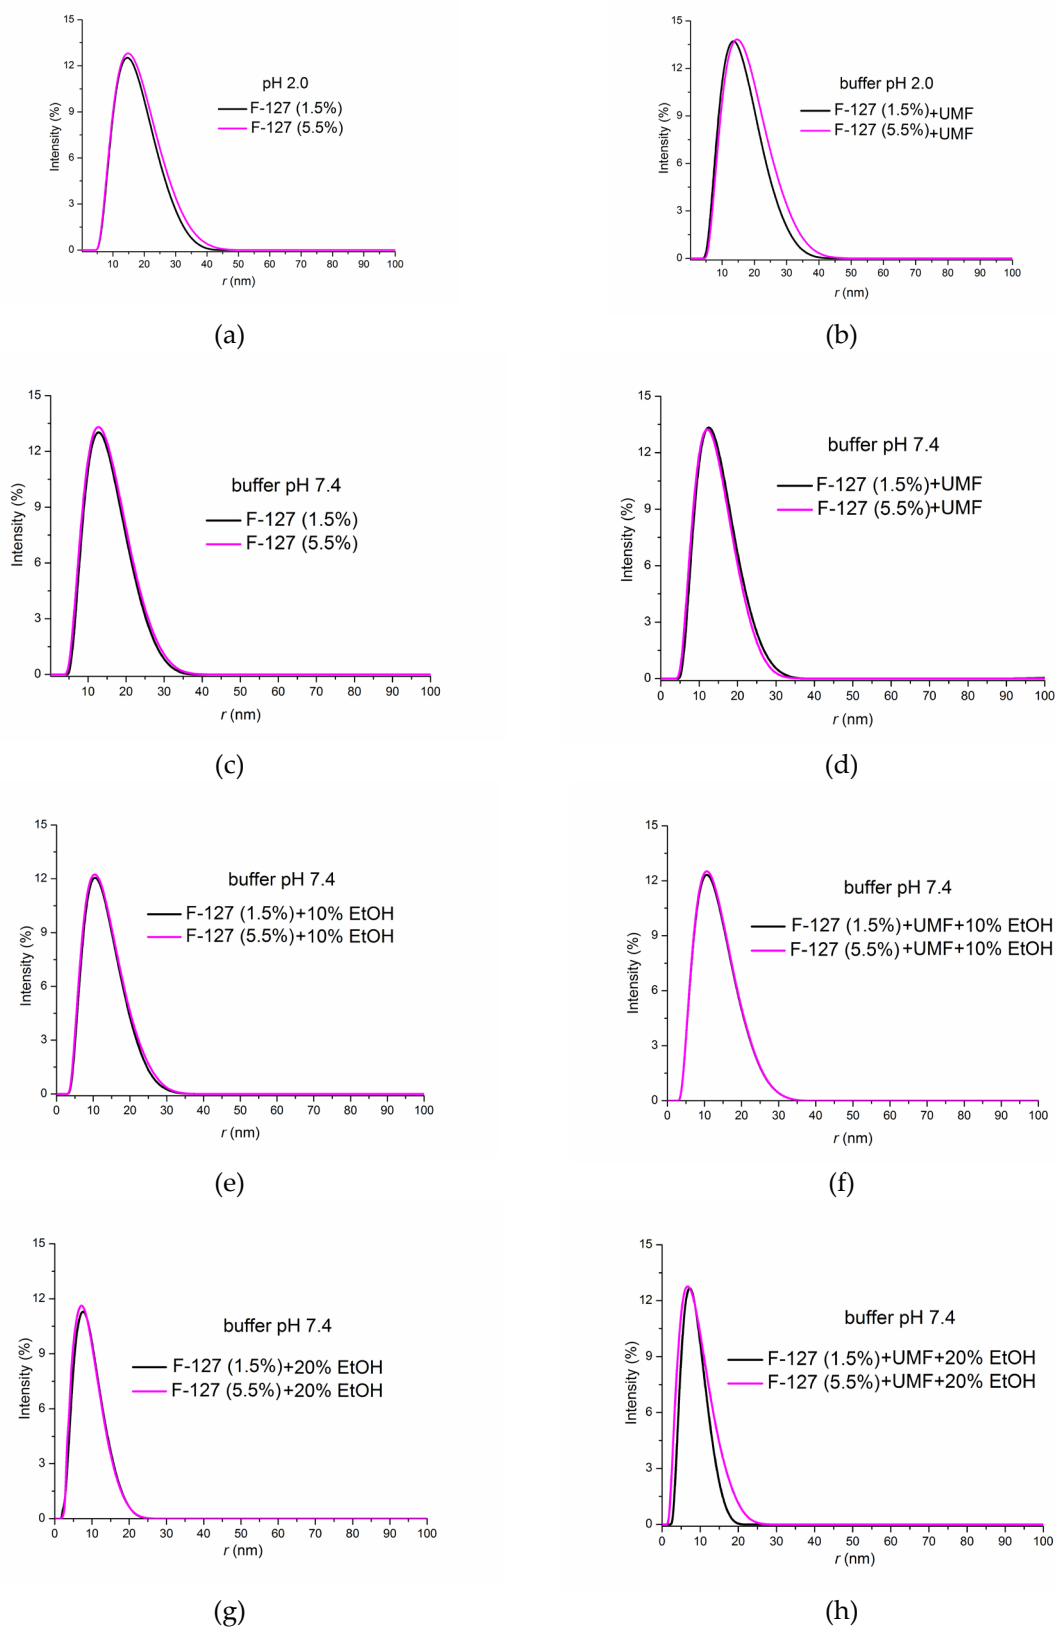

**Figure S5.** Size distribution of F127 micelles: (a) buffer pH 2.0; (b) buffer pH 2.0+UMF; (c) buffer pH 7.4; (d) buffer pH 7.4+UMF; (e) buffer pH 7.4+10% EtOH; (f) buffer pH 7.4+10% EtOH+UMF; (g) buffer pH 7.4+20% EtOH; (h) buffer pH 7.4+20% EtOH+UMF.

**Table S1.** UMF experimental solubility ( $S_{UMF}$ ) in buffer pH 2.0, pH 7.4, and with the addition of F-127, and 10% or 20% ethanol at 310.15 K.

| $C_{F-127}$<br>(w/v%) | buffer<br>pH 2.0         | buffer<br>pH 7.4         | buffer pH 7.4<br>+10% EtOH | buffer pH 7.4<br>+20% EtOH |
|-----------------------|--------------------------|--------------------------|----------------------------|----------------------------|
|                       | $S_{UMF} \cdot 10^3$ (M) | $S_{UMF} \cdot 10^4$ (M) | $S_{UMF} \cdot 10^4$ (M)   | $S_{UMF} \cdot 10^4$ (M)   |
| 0                     | 0.71±0.02                | 1.60±0.01                | 1.80±0.01                  | 0.30±0.01                  |
| 1.5                   | 2.05±0.04                | 1.74±0.03                | 1.94±0.01                  | 2.76±0.03                  |
| 4.0                   | 3.99±0.08                | 3.93±0.03                | 4.77±0.03                  | 7.00±0.05                  |
| 5.5                   | 5.61±0.04                | 5.86±0.02                | 6.89±0.07                  | 9.83±0.11                  |
| 7.0                   | 6.34±0.03                | 6.96±0.04                | 8.06±0.07                  | 11.80±0.09                 |

Each solubility value represents the mean  $\pm$  SD ( $n \geq 3$ )

The standard uncertainties are  $u(T) = 0.15$  K

**Table S2.** Donor solution concentrations ( $C_0$ ), steady state flux ( $J$ ), and permeability coefficients ( $P_{app}$ ) of UMF, 310.15 K.

| Investigated system                      | $C_0$ (M)            | $J$ ( $\mu\text{mol} \cdot \text{cm}^{-2} \cdot \text{sec}^{-1}$ ) | $P_{app}$ ( $\text{cm} \cdot \text{s}^{-1}$ ) |
|------------------------------------------|----------------------|--------------------------------------------------------------------|-----------------------------------------------|
| pH 7.4 cellulose membrane MWCO 12-14 kDa |                      |                                                                    |                                               |
| UMF                                      | $1.04 \cdot 10^{-5}$ | $4.36 \cdot 10^{-7}$                                               | $(4.19 \pm 0.11) \cdot 10^{-5}$               |
| UMF+10% EtOH                             | $8.55 \cdot 10^{-6}$ | $4.93 \cdot 10^{-7}$                                               | $(5.76 \pm 0.14) \cdot 10^{-5}$               |
| UMF+20% EtOH                             | $1.25 \cdot 10^{-5}$ | $6.25 \cdot 10^{-7}$                                               | $(4.98 \pm 0.11) \cdot 10^{-5}$               |
| UMF+1.5% F-127                           | $5.24 \cdot 10^{-5}$ | $1.22 \cdot 10^{-6}$                                               | $(2.34 \pm 0.07) \cdot 10^{-5}$               |
| UMF+4.0% F-127                           | $5.75 \cdot 10^{-5}$ | $1.02 \cdot 10^{-6}$                                               | $(1.78 \pm 0.04) \cdot 10^{-5}$               |
| UMF+10% EtOH+1.5% F-127                  | $1.88 \cdot 10^{-5}$ | $4.86 \cdot 10^{-7}$                                               | $(2.59 \pm 0.06) \cdot 10^{-5}$               |
| UMF+20% EtOH+1.5% F-127                  | $7.77 \cdot 10^{-5}$ | $3.58 \cdot 10^{-7}$                                               | $(4.61 \pm 0.04) \cdot 10^{-6}$               |
| pH 2.0 cellulose membrane MWCO 12-14 kDa |                      |                                                                    |                                               |
| UMF                                      | $1.41 \cdot 10^{-4}$ | $2.76 \cdot 10^{-6}$                                               | $(1.96 \pm 0.07) \cdot 10^{-5}$               |
| UMF+1.5% F-127                           | $3.57 \cdot 10^{-4}$ | $4.19 \cdot 10^{-6}$                                               | $(1.17 \pm 0.02) \cdot 10^{-5}$               |
| UMF+4.0% F-127                           | $1.26 \cdot 10^{-3}$ | $7.09 \cdot 10^{-6}$                                               | $(5.63 \pm 0.18) \cdot 10^{-6}$               |
| pH 2.0 cellulose membrane MWCO 6-8 kDa   |                      |                                                                    |                                               |
| UMF                                      | $1.80 \cdot 10^{-4}$ | $3.27 \cdot 10^{-6}$                                               | $(1.82 \pm 0.05) \cdot 10^{-5}$               |
| UMF+1.5% F-127                           | $3.07 \cdot 10^{-4}$ | $3.36 \cdot 10^{-6}$                                               | $(1.09 \pm 0.02) \cdot 10^{-5}$               |
